# Supplementary material
Source: PubMed Central journal article supplement (PMC7222224)
Supplement: NIHMS1503446-supplement-2.pdf [file NIHMS1503446-supplement-2.pdf]

Supplemental Table 1. Location of metastasis used for array analysis

| <b>Site of Metastasis</b> | <b>n=26</b> |
|---------------------------|-------------|
| <b>Pancreas</b>           | <b>4</b>    |
| <b>Adrenal</b>            | <b>6</b>    |
| <b>Peritoneum</b>         | <b>1</b>    |
| <b>Lymph Node</b>         | <b>2</b>    |
| <b>Soft Tissue</b>        | <b>6</b>    |
| <b>Bone</b>               | <b>3</b>    |
| <b>Liver</b>              | <b>2</b>    |
| <b>Lung</b>               | <b>2</b>    |

Supplementary Table 2: List of ccRCC associated genes showing inverse correlation between gene expression and promoter methylation status

| Probe ID                                                                                                                                        | Gene symbol | Gene title                                              | Metastatic RCC (n=26) vs Normal (n=9) |             | Primary RCC (n=9) vs Normal (n=9) |            | Metastatic RCC (n=26) vs Normal (n=9) |            | Primary RCC (n=9) vs Normal (n=9) |           |                       |            |            |             |            |          |           |                       |            |            |             |         |
|-------------------------------------------------------------------------------------------------------------------------------------------------|-------------|---------------------------------------------------------|---------------------------------------|-------------|-----------------------------------|------------|---------------------------------------|------------|-----------------------------------|-----------|-----------------------|------------|------------|-------------|------------|----------|-----------|-----------------------|------------|------------|-------------|---------|
|                                                                                                                                                 |             |                                                         | Regulation                            | Fold change | P-value                           | Regulation | Fold change                           | P-value    | Probe ID                          | Ref. gene | Relation to Ref. gene | Location   | Regulation | Fold change | P-value    | Probe ID | Ref. gene | Relation to Ref. gene | Location   | Regulation | Fold change | P-value |
| <b>Genes up-regulated in Metastatic and Primary RCC compared normal and show promoter hypomethylation in Metastatic and Primary RCC samples</b> |             |                                                         |                                       |             |                                   |            |                                       |            |                                   |           |                       |            |            |             |            |          |           |                       |            |            |             |         |
| LMM_1708934                                                                                                                                     | ADM         | adrenomedullin (ADM) [cp] Down                          | 2.740760909                           | 0.00049493  | 0.00412                           | 0.00229810 | ADAM                                  | N. Shave   | TS500                             | Down      | 2.46480896            | 2.85E-05   | 0.00262610 | ADM         | N. Shave   | TS500    | Down      | 2.41144887            | 0.00511207 |            |             |         |
| LMM_1709794                                                                                                                                     | ALDOC       | aldolase C (Aldolase-C) [cp] Down                       | 5.13878427                            | 2.0804E-05  | 1.67750748E-07                    | 0.00076144 | ALDOC                                 | O. Dentata | TS500                             | Down      | 2.25811229            | 2.5E-05    | 0.00131137 | ALDOC       | O. Dentata | TS500    | Down      | 2.21190974            | 0.00176092 |            |             |         |
| LMM_1709794                                                                                                                                     | ALDOC       | aldolase C (Aldolase-C) [cp] Down                       | 5.13878427                            | 2.0804E-05  | 1.67750748E-07                    | 0.00076144 | ALDOC                                 | O. Dentata | TS500                             | Down      | 1.88718869            | 7.8E-07    | 0.00178138 | ALDOC       | O. Dentata | TS500    | Down      | 2.84447487            | 0.00091291 |            |             |         |
| LMM_174881                                                                                                                                      | CMB         | CMB antigen (CMB) [cp] Down                             | 2.62641441                            | 1.2038E-06  | 2.41687814E-08                    | 0.00134461 | CMB                                   | N. Shave   | TS500                             | Down      | 2.28117882            | 0.00132058 | 0.00145016 | ALDOC       | O. Dentata | TS500    | Down      | 2.13097263            | 0.01092724 |            |             |         |
| LMM_176256                                                                                                                                      | C5orf10     | chromosome 5 open reading frame 10 [cp] Down            | 2.35006917                            | 0.00218493  | 3.69238954E-06                    | 0.0023139  | C5orf10                               | N. Shave   | TS500                             | Down      | 1.02186915            | 0.00511811 | 0.00444771 | C5orf10     | N. Shave   | TS500    | Down      | 2.21687888            | 0.00592767 |            |             |         |
| LMM_214026                                                                                                                                      | CAV1        | caveolin 1 (Caveolin-1) [cp] Down                       | 1.9725883                             | 1.715E-05   | 4.48829513E-07                    | 0.0022041  | CAV1                                  | N. Shave   | TS500                             | Down      | 2.61912870            | 0.00049486 | 0.00049486 | CAV1        | N. Shave   | TS500    | Down      | 2.70815301            | 0.00044357 |            |             |         |
| LMM_168783                                                                                                                                      | CAV1        | caveolin 1 (Caveolin-1) [cp] Down                       | 2.71365215                            | 7.767E-05   | 2.40375813E-07                    | 0.054068   | CAV1                                  | N. Shave   | TS500                             | Down      | 2.56145402            | 3.24E-06   | 0.00076144 | CAV1        | N. Shave   | TS500    | Down      | 2.21190974            | 0.00176092 |            |             |         |
| LMM_174881                                                                                                                                      | CMB         | CMB antigen (CMB) [cp] Down                             | 2.62641441                            | 1.2038E-06  | 2.41687814E-08                    | 0.00134461 | CMB                                   | N. Shave   | TS500                             | Down      | 1.90379171            | 0.00076144 | 0.00076144 | CMB         | N. Shave   | TS500    | Down      | 2.25811229            | 0.00176092 |            |             |         |
| LMM_181620                                                                                                                                      | CYP7        | cytochrome P450 family 7 subfamily 1 member 1 [cp] Down | 1.90094411                            | 8.04E-06    | 1.00094411E-06                    | 0.00084411 | CYP7                                  | N. Shave   | TS500                             | Down      | 2.35202150            | 3.26E-05   | 0.00131137 | CYP7        | N. Shave   | TS500    | Down      | 1.42422937            | 0.00045491 |            |             |         |
| LMM_172486                                                                                                                                      | HK2         | hexokinase 2 (HK2) [cp] Down                            | 3.49675991                            | 1.6546E-06  | 2.31684521E-08                    | 0.0016303  | HK2                                   | N. Shave   | TS500                             | Down      | 4.02948763            | 3.8E-05    | 0.0059692  | HK2         | N. Shave   | TS500    | Down      | 2.59274862            | 0.00088221 |            |             |         |
| LMM_176489                                                                                                                                      | HPCAL1      | hypoxanthine phosphoribosyl transferase 1 [cp] Down     | 1.71794996                            | 0.00081510  | 2.89975112E-07                    | 0.0044144  | HPCAL1                                | O. Dentata | TS500                             | Down      | 2.60093941            | 2.8E-05    | 0.00076144 | HPCAL1      | O. Dentata | TS500    | Down      | 1.8681451             | 0.00065330 |            |             |         |
| LMM_172486                                                                                                                                      | HK2         | hexokinase 2 (HK2) [cp] Down                            | 3.49675991                            | 1.6546E-06  | 2.31684521E-08                    | 0.0016303  | HK2                                   | N. Shave   | TS500                             | Down      | 2.6077077             | 0.00044731 | 0.00177111 | HPCAL1      | O. Dentata | TS500    | Down      | 2.50482468            | 0.01209179 |            |             |         |
| LMM_172486                                                                                                                                      | HK2         | hexokinase 2 (HK2) [cp] Down                            | 3.49675991                            | 1.6546E-06  | 2.31684521E-08                    | 0.0016303  | HK2                                   | N. Shave   | TS500                             | Down      | 2.31914294            | 0.00076144 | 0.00076144 | HPCAL1      | O. Dentata | TS500    | Down      | 2.25811229            | 0.00176092 |            |             |         |
| LMM_172486                                                                                                                                      | HK2         | hexokinase 2 (HK2) [cp] Down                            | 3.49675991                            | 1.6546E-06  | 2.31684521E-08                    | 0.0016303  | HK2                                   | N. Shave   | TS500                             | Down      | 2.6077077             | 0.00044731 | 0.00177111 | HPCAL1      | O. Dentata | TS500    | Down      | 2.50482468            | 0.01209179 |            |             |         |
| LMM_172486                                                                                                                                      | HK2         | hexokinase 2 (HK2) [cp] Down                            | 3.49675991                            | 1.6546E-06  | 2.31684521E-08                    | 0.0016303  | HK2                                   | N. Shave   | TS500                             | Down      | 2.31914294            | 0.00076144 | 0.00076144 | HPCAL1      | O. Dentata | TS500    | Down      | 2.25811229            | 0.00176092 |            |             |         |
| LMM_172486                                                                                                                                      | HK2         | hexokinase 2 (HK2) [cp] Down                            | 3.49675991                            | 1.6546E-06  | 2.31684521E-08                    | 0.0016303  | HK2                                   | N. Shave   | TS500                             | Down      | 2.6077077             | 0.00044731 | 0.00177111 | HPCAL1      | O. Dentata | TS500    | Down      | 2.50482468            | 0.01209179 |            |             |         |
| LMM_172486                                                                                                                                      | HK2         | hexokinase 2 (HK2) [cp] Down                            | 3.49675991                            | 1.6546E-06  | 2.31684521E-08                    | 0.0016303  | HK2                                   | N. Shave   | TS500                             | Down      | 2.31914294            | 0.00076144 | 0.00076144 | HPCAL1      | O. Dentata | TS500    | Down      | 2.25811229            | 0.00176092 |            |             |         |
| LMM_172486                                                                                                                                      | HK2         | hexokinase 2 (HK2) [cp] Down                            | 3.49675991                            | 1.6546E-06  | 2.31684521E-08                    | 0.0016303  | HK2                                   | N. Shave   | TS500                             | Down      | 2.6077077             | 0.00044731 | 0.00177111 | HPCAL1      | O. Dentata | TS500    | Down      | 2.50482468            | 0.01209179 |            |             |         |
| LMM_172486                                                                                                                                      | HK2         | hexokinase 2 (HK2) [cp] Down                            | 3.49675991                            | 1.6546E-06  | 2.31684521E-08                    | 0.0016303  | HK2                                   | N. Shave   | TS500                             | Down      | 2.31914294            | 0.00076144 | 0.00076144 | HPCAL1      | O. Dentata | TS500    | Down      | 2.25811229            | 0.00176092 |            |             |         |
| LMM_172486                                                                                                                                      | HK2         | hexokinase 2 (HK2) [cp] Down                            | 3.49675991                            | 1.6546E-06  | 2.31684521E-08                    | 0.0016303  | HK2                                   | N. Shave   | TS500                             | Down      | 2.6077077             | 0.00044731 | 0.00177111 | HPCAL1      | O. Dentata | TS500    | Down      | 2.50482468            | 0.01209179 |            |             |         |
| LMM_172486                                                                                                                                      | HK2         | hexokinase 2 (HK2) [cp] Down                            | 3.49675991                            | 1.6546E-06  | 2.31684521E-08                    | 0.0016303  | HK2                                   | N. Shave   | TS500                             | Down      | 2.31914294            | 0.00076144 | 0.00076144 | HPCAL1      | O. Dentata | TS500    | Down      | 2.25811229            | 0.00176092 |            |             |         |
| LMM_172486                                                                                                                                      | HK2         | hexokinase 2 (HK2) [cp] Down                            | 3.49675991                            | 1.6546E-06  | 2.31684521E-08                    | 0.0016303  | HK2                                   | N. Shave   | TS500                             | Down      | 2.6077077             | 0.00044731 | 0.00177111 | HPCAL1      | O. Dentata | TS500    | Down      | 2.50482468            | 0.01209179 |            |             |         |
| LMM_172486                                                                                                                                      | HK2         | hexokinase 2 (HK2) [cp] Down                            | 3.49675991                            | 1.6546E-06  | 2.31684521E-08                    | 0.0016303  | HK2                                   | N. Shave   | TS500                             | Down      | 2.31914294            | 0.00076144 | 0.00076144 | HPCAL1      | O. Dentata | TS500    | Down      | 2.25811229            | 0.00176092 |            |             |         |
| LMM_172486                                                                                                                                      | HK2         | hexokinase 2 (HK2) [cp] Down                            | 3.49675991                            | 1.6546E-06  | 2.31684521E-08                    | 0.0016303  | HK2                                   | N. Shave   | TS500                             | Down      | 2.6077077             | 0.00044731 | 0.00177111 | HPCAL1      | O. Dentata | TS500    | Down      | 2.50482468            | 0.01209179 |            |             |         |
| LMM_172486                                                                                                                                      | HK2         | hexokinase 2 (HK2) [cp] Down                            | 3.49675991                            | 1.6546E-06  | 2.31684521E-08                    | 0.0016303  | HK2                                   | N. Shave   | TS500                             | Down      | 2.31914294            | 0.00076144 | 0.00076144 | HPCAL1      | O. Dentata | TS500    | Down      | 2.25811229            | 0.00176092 |            |             |         |
| LMM_172486                                                                                                                                      | HK2         | hexokinase 2 (HK2) [cp] Down                            | 3.49675991                            | 1.6546E-06  | 2.31684521E-08                    | 0.0016303  | HK2                                   | N. Shave   | TS500                             | Down      | 2.6077077             | 0.00044731 | 0.00177111 | HPCAL1      | O. Dentata | TS500    | Down      | 2.50482468            | 0.01209179 |            |             |         |
| LMM_172486                                                                                                                                      | HK2         | hexokinase 2 (HK2) [cp] Down                            | 3.49675991                            | 1.6546E-06  | 2.31684521E-08                    | 0.0016303  | HK2                                   | N. Shave   | TS500                             | Down      | 2.31914294            | 0.00076144 | 0.00076144 | HPCAL1      | O. Dentata | TS500    | Down      | 2.25811229            | 0.00176092 |            |             |         |
| LMM_172486                                                                                                                                      | HK2         | hexokinase 2 (HK2) [cp] Down                            | 3.49675991                            | 1.6546E-06  | 2.31684521E-08                    | 0.0016303  | HK2                                   | N. Shave   | TS500                             | Down      | 2.6077077             | 0.00044731 | 0.00177111 | HPCAL1      | O. Dentata | TS500    | Down      | 2.50482468            | 0.01209179 |            |             |         |
| LMM_172486                                                                                                                                      | HK2         | hexokinase 2 (HK2) [cp] Down                            | 3.49675991                            | 1.6546E-06  | 2.31684521E-08                    | 0.0016303  | HK2                                   | N. Shave   | TS500                             | Down      | 2.31914294            | 0.00076144 | 0.00076144 | HPCAL1      | O. Dentata | TS500    | Down      | 2.25811229            | 0.00176092 |            |             |         |
| LMM_172486                                                                                                                                      | HK2         | hexokinase 2 (HK2) [cp] Down                            | 3.49675991                            | 1.6546E-06  | 2.31684521E-08                    | 0.0016303  | HK2                                   | N. Shave   | TS500                             | Down      | 2.6077077             | 0.00044731 | 0.00177111 | HPCAL1      | O. Dentata | TS500    | Down      | 2.50482468            | 0.01209179 |            |             |         |
| LMM_172486                                                                                                                                      | HK2         | hexokinase 2 (HK2) [cp] Down                            | 3.49675991                            | 1.6546E-06  | 2.31684521E-08                    | 0.0016303  | HK2                                   | N. Shave   | TS500                             | Down      | 2.31914294            | 0.00076144 | 0.00076144 | HPCAL1      | O. Dentata | TS500    | Down      | 2.25811229            | 0.00176092 |            |             |         |
| LMM_172486                                                                                                                                      | HK2         | hexokinase 2 (HK2) [cp] Down                            | 3.49675991                            | 1.6546E-06  | 2.31684521E-08                    | 0.0016303  | HK2                                   | N. Shave   | TS500                             | Down      | 2.6077077             | 0.00044731 | 0.00177111 | HPCAL1      | O. Dentata | TS500    | Down      | 2.50482468            | 0.01209179 |            |             |         |
| LMM_172486                                                                                                                                      | HK2         | hexokinase 2 (HK2) [cp] Down                            | 3.49675991                            | 1.6546E-06  | 2.31684521E-08                    | 0.0016303  | HK2                                   | N. Shave   | TS500                             | Down      | 2.31914294            | 0.00076144 | 0.00076144 | HPCAL1      | O. Dentata | TS500    | Down      | 2.25811229            | 0.00176092 |            |             |         |
| LMM_172486                                                                                                                                      | HK2         | hexokinase 2 (HK2) [cp] Down                            | 3.49675991                            | 1.6546E-06  | 2.31684521E-08                    | 0.0016303  | HK2                                   | N. Shave   | TS500                             | Down      | 2.6077077             | 0.00044731 | 0.00177111 | HPCAL1      | O. Dentata | TS500    | Down      | 2.50482468            | 0.01209179 |            |             |         |
| LMM_172486                                                                                                                                      | HK2         | hexokinase 2 (HK2) [cp] Down                            | 3.49675991                            | 1.6546E-06  | 2.31684521E-08                    | 0.0016303  | HK2                                   | N. Shave   | TS500                             | Down      | 2.31914294            | 0.00076144 | 0.00076144 | HPCAL1      | O. Dentata | TS500    | Down      | 2.25811229            | 0.00176092 |            |             |         |
| LMM_172486                                                                                                                                      | HK2         | hexokinase 2 (HK2) [cp] Down                            | 3.49675991                            | 1.6546E-06  | 2.31684521E-08                    | 0.0016303  | HK2                                   | N. Shave   | TS500                             | Down      | 2.6077077             | 0.00044731 | 0.00177111 | HPCAL1      | O. Dentata | TS500    | Down      | 2.50482468            | 0.01209179 |            |             |         |
| LMM_172486                                                                                                                                      | HK2         | hexokinase 2 (HK2) [cp] Down                            | 3.49675991                            | 1.6546E-06  | 2.31684521E-08                    | 0.0016303  | HK2                                   | N. Shave   | TS500                             | Down      | 2.31914294            | 0.00076144 | 0.00076144 | HPCAL1      | O. Dentata | TS500    | Down      | 2.25811229            | 0.00176092 |            |             |         |
| LMM_172486                                                                                                                                      | HK2         | hexokinase 2 (HK2) [cp] Down                            | 3.49675991                            | 1.6546E-06  | 2.31684521E-08                    | 0.0016303  | HK2                                   | N. Shave   | TS500                             | Down      | 2.6077077             | 0.00044731 | 0.00177111 | HPCAL1      | O. Dentata | TS500    | Down      | 2.50482468            | 0.01209179 |            |             |         |
| LMM_172486                                                                                                                                      | HK2         | hexokinase 2 (HK2) [cp] Down                            | 3.49675991                            | 1.6546E-06  | 2.31684521E-08                    | 0.0016303  | HK2                                   | N. Shave   | TS500                             | Down      | 2.31914294            | 0.00076144 | 0.00076144 | HPCAL1      | O. Dentata | TS500    | Down      | 2.25811229            | 0.00176092 |            |             |         |
| LMM_172486                                                                                                                                      | HK2         | hexokinase 2 (HK2) [cp] Down                            | 3.49675991                            | 1.6546E-06  | 2.31684521E-08                    | 0.0016303  | HK2                                   | N. Shave   | TS500                             | Down      | 2.6077077             | 0.00044731 | 0.00177111 | HPCAL1      | O. Dentata | TS500    | Down      | 2.50482468            | 0.01209179 |            |             |         |
| LMM_172486                                                                                                                                      | HK2         | hexokinase 2 (HK2) [cp] Down                            | 3.49675991                            | 1.6546E-06  | 2.31684521E-08                    | 0.0016303  | HK2                                   | N. Shave   | TS500                             | Down      | 2.31914294            | 0.00076144 | 0.00076144 | HPCAL1      | O. Dentata | TS500    | Down      | 2.25811229            | 0.00176092 |            |             |         |
| LMM_172486                                                                                                                                      | HK2         | hexokinase 2 (HK2) [cp] Down                            | 3.49675991                            | 1.6546E-06  | 2.31684521E-08                    | 0.0016303  | HK2                                   | N. Shave   | TS500                             | Down      | 2.6077077             | 0.00044731 | 0.00177111 | HPCAL1      | O. Dentata | TS500    | Down      | 2.50482468            | 0.01209179 |            |             |         |
| LMM_172486                                                                                                                                      | HK2         | hexokinase 2 (HK2) [cp] Down                            | 3.49675991                            | 1.6546E-06  | 2.31684521E-08                    | 0.0016303  | HK2                                   | N. Shave   | TS500                             | Down      | 2.31914294            | 0.00076144 | 0.00076144 | HPCAL1      | O. Dentata | TS500    | Down      | 2.25811229            | 0.00176092 |            |             |         |
| LMM_172486                                                                                                                                      | HK2         | hexokinase 2 (HK2) [cp] Down                            | 3.49675991                            | 1.6546E-06  | 2.31684521E-08                    | 0.0016303  | HK2                                   | N. Shave   | TS500                             | Down      | 2.6077077             | 0.00044731 | 0.00177111 | HPCAL1      | O. Dentata | TS500    | Down      | 2.50482468            | 0.01209179 |            |             |         |
| LMM_172486                                                                                                                                      | HK2         | hexokinase 2 (HK2) [cp] Down                            | 3.49675991                            | 1.6546E-06  | 2.31684521E-08                    | 0.0016303  | HK2                                   | N. Shave   | TS500                             | Down      | 2.31914294            | 0.00076144 | 0.00076144 | HPCAL1      | O. Dentata | TS500    | Down      | 2.25811229            | 0.00176092 |            |             |         |
| LMM_172486                                                                                                                                      | HK2         | hexokinase 2 (HK2) [cp] Down                            | 3.49675991                            | 1.65        |                                   |            |                                       |            |                                   |           |                       |            |            |             |            |          |           |                       |            |            |             |         |

Supplementary Table 3: TCGA Validation of promoter methylation status of 35 ccRCC associated genes.

| TCGA-Kidney clear cell renal carcinoma[KIRC] (n=325) vs<br>TCGA-Kidney Normal (n=160) |                     |                    |                      |            |                                               |          |            |                 |                    |                         |            |             |          |
|---------------------------------------------------------------------------------------|---------------------|--------------------|----------------------|------------|-----------------------------------------------|----------|------------|-----------------|--------------------|-------------------------|------------|-------------|----------|
| Genes with hypomethylated promoter CpG sites                                          |                     |                    |                      |            | Genes with hypermethylated promoter CpG sites |          |            |                 |                    |                         |            |             |          |
| Probe ID                                                                              | Ref_gene            | Relation to Island | Location             | Regulation | Fold change                                   | P-value  | Probe ID   | Ref_gene        | Relation to Island | Location                | Regulation | Fold change | P-value  |
| cg02181247                                                                            | ADM                 | N Shore            | TSS1500              | Down       | 1.56                                          | 1.06E-33 | cg17107017 | ATP1A1;ATP1A1;A | OpenSea            | TSS1500;Body;Body       | Up         | 3.14        | 5.8E-120 |
| cg08259810                                                                            | ADM                 | N Shore            | TSS1500              | Down       | 1.50                                          | 1.55E-22 | cg20309677 | ATP1A1;ATP1A1;A | OpenSea            | TSS1500;Body;Body       | Up         | 2.06        | 9.28E-72 |
| cg15835620                                                                            | ALDOC;ALDOC         | OpenSea            | 5'UTR;1stExon        | Down       | 2.89                                          | 7.16E-43 | cg17469276 | ATP1A1;ATP1A1;A | OpenSea            | TSS1500;Body;Body       | Up         | 1.81        | 1.07E-32 |
| cg06367117                                                                            | ALDOC;ALDOC         | OpenSea            | 5'UTR;1stExon        | Down       | 1.66                                          | 4.54E-11 | cg07429038 | ATP6V0A4;ATP6V  | OpenSea            | 1stExon;5'UTR;1stExon;5 | Up         | 2.87        | 4.83E-53 |
| cg13344757                                                                            | ALDOC               | OpenSea            | TSS1500              | Down       | 1.83                                          | 1.38E-27 | cg17093826 | ATP6V0A4;ATP6V  | OpenSea            | 5'UTR;1stExon;5'UTR;5'U | Up         | 1.73        | 9.85E-22 |
| cg27183188                                                                            | ALDOC               | OpenSea            | TSS200               | Down       | 3.28                                          | 8.5E-37  | cg21048168 | ATP6V0A4;ATP6V  | OpenSea            | 5'UTR;5'UTR;TSS200      | Up         | 1.94        | 5.15E-26 |
| cg14668747                                                                            | ALDOC               | OpenSea            | TSS200               | Down       | 2.98                                          | 5.26E-36 | cg02491878 | ATP6V0A4;TMEM   | OpenSea            | 5'UTR;TSS200;5'UTR      | Up         | 1.91        | 4.29E-29 |
| cg13990559                                                                            | ALDOC               | OpenSea            | TSS200               | Down       | 1.82                                          | 4.64E-31 | cg16354688 | CLCNKB;CLCNKB   | OpenSea            | 1stExon;5'UTR           | Up         | 2.64        | 1.46E-64 |
| cg02344926                                                                            | ALDOC               | OpenSea            | TSS200               | Down       | 1.50                                          | 2.83E-13 | cg20320574 | CLCNKB          | OpenSea            | TSS1500                 | Up         | 1.72        | 1.38E-23 |
| cg04474049                                                                            | CAV1                | N Shore            | TSS1500              | Down       | 5.22                                          | 7.1E-157 | cg02634641 | CLCNKB          | OpenSea            | TSS1500                 | Up         | 1.66        | 1.8E-21  |
| cg20897119                                                                            | CAV1                | N Shore            | TSS1500              | Down       | 2.25                                          | 1.26E-56 | cg15558527 | CLCNKB;CLCNKB   | OpenSea            | TSS1500;Body            | Up         | 1.67        | 1.02E-36 |
| cg01265597                                                                            | CAV1                | N Shore            | TSS1500              | Down       | 1.69                                          | 1.25E-52 | cg21660130 | CLCNKB          | OpenSea            | TSS200                  | Up         | 4.08        | 1.99E-89 |
| cg25515317                                                                            | CAV1                | N Shore            | TSS1500              | Down       | 1.52                                          | 3.47E-15 | cg21784833 | ESRRG           | Island             | TSS200                  | Up         | 2.64        | 7.88E-44 |
| cg17469978                                                                            | CAV1                | Island             | TSS200               | Down       | 3.63                                          | 7.1E-159 | cg06634716 | ESRRG           | Island             | TSS200                  | Up         | 1.83        | 2.67E-18 |
| cg07838272                                                                            | CAV1                | N Shore            | TSS200               | Down       | 2.43                                          | 8.84E-76 | cg25755575 | ESRRG           | Island             | TSS1500                 | Up         | 1.77        | 3.34E-22 |
| cg24980983                                                                            | CAV1                | Island             | TSS200               | Down       | 1.92                                          | 3.8E-47  | cg11800620 | ESRRG           | S Shore            | TSS1500                 | Up         | 1.57        | 2.03E-15 |
| cg05209483                                                                            | CD68;CD68;CD68;CD68 | N Shelf            | 1stExon;5'UTR;1stExo | Down       | 6.94                                          | 6.2E-126 | cg25975621 | ESRRG           | Island             | TSS200                  | Up         | 1.55        | 3.8E-08  |
| cg18900669                                                                            | CD68;CD68           | N Shelf            | TSS1500;TSS1500      | Down       | 2.24                                          | 8.28E-63 | cg10599770 | FAM3B;FAM3B     | N Shore            | TSS200;TSS200           | Up         | 2.67        | 2.29E-58 |
| cg21808046                                                                            | CD68;CD68           | N Shelf            | TSS1500;TSS1500      | Down       | 2.61                                          | 1.43E-62 | cg24376266 | FAM3B;FAM3B     | N Shore            | TSS200;TSS200           | Up         | 2.53        | 4.04E-30 |
| cg15059117                                                                            | CD68;CD68           | N Shelf            | TSS200;TSS200        | Down       | 4.32                                          | 3.9E-118 | cg22612764 | FAM3B;FAM3B     | N Shore            | TSS200;TSS200           | Up         | 1.74        | 3.66E-26 |
| cg00673646                                                                            | MS4A6A;MS4A6A;MS    | OpenSea            | 1stExon;5'UTR;5'UTR  | Down       | 5.81                                          | 7E-113   | cg16353596 | FAM3B;FAM3B     | N Shore            | TSS200;TSS200           | Up         | 1.81        | 2.36E-25 |
| cg26250585                                                                            | MS4A6A;MS4A6A;MS    | OpenSea            | TSS200;TSS200;TSS200 | Down       | 2.83                                          | 1.89E-58 | cg11286641 | FAM3B;FAM3B     | N Shore            | TSS200;TSS200           | Up         | 1.95        | 7.98E-19 |
| cg06881914                                                                            | MS4A6A;MS4A6A;MS    | OpenSea            | TSS1500;TSS1500;TSS  | Down       | 2.16                                          | 3.9E-36  | cg20336571 | H2AFY2          | N Shore            | TSS1500                 | Up         | 1.61        | 3.42E-19 |
| cg24026212                                                                            | MS4A6A;MS4A6A;MS    | OpenSea            | TSS1500;TSS1500;TSS  | Down       | 2.12                                          | 1.05E-43 | cg02195211 | H2AFY2          | Island             | TSS200                  | Up         | 1.57        | 6.96E-21 |
| cg20284999                                                                            | MS4A6A;MS4A6A;MS    | OpenSea            | TSS1500;TSS1500;TSS  | Down       | 2.10                                          | 5.26E-44 | cg04539203 | H2AFY2          | Island             | TSS200                  | Up         | 1.54        | 3.91E-18 |
| cg04353769                                                                            | MS4A6A;MS4A6A;MS    | OpenSea            | TSS1500;TSS1500;TSS  | Down       | 1.73                                          | 9.39E-32 | cg17558573 | H2AFY2          | Island             | TSS200                  | Up         | 1.51        | 1.99E-19 |
| cg07170641                                                                            | MS4A7;MS4A7;MS4A    | OpenSea            | 5'UTR;5'UTR;5'UTR    | Down       | 1.54                                          | 8.96E-19 | cg14481339 | KCNJ1;KCNJ1;KCN | OpenSea            | TSS200;TSS200;TSS200;T  | Up         | 3.16        | 1.15E-57 |
| cg18343292                                                                            | MS4A7;MS4A7;MS4A    | OpenSea            | 5'UTR;5'UTR;1stExon  | Down       | 2.85                                          | 0.00     | cg13267718 | KCNJ1;KCNJ1;KCN | OpenSea            | TSS200;TSS200;TSS200;T  | Up         | 3.01        | 1.37E-52 |
| cg10853416                                                                            | MS4A7;MS4A7;MS4A    | OpenSea            | TSS1500;TSS1500;TSS  | Down       | 2.23                                          | 0.00     | cg13675753 | KCNJ1;KCNJ1;KCN | OpenSea            | TSS200;TSS200;TSS200;T  | Up         | 2.40        | 2.35E-37 |
| cg14632030                                                                            | MS4A7;MS4A7;MS4A    | OpenSea            | TSS1500;TSS1500;TSS  | Down       | 1.63                                          | 0.00     | cg05193830 | KCNJ1;KCNJ1;KCN | OpenSea            | 5'UTR;5'UTR;5'UTR;5'UT  | Up         | 2.05        | 6.81E-30 |
| cg26351966                                                                            | SCD                 | N Shore            | TSS1500              | Down       | 3.20                                          | 6.6E-122 | cg07713705 | KCNJ1;KCNJ1;KCN | OpenSea            | 5'UTR;5'UTR;5'UTR;TSS2  | Up         | 1.70        | 3.95E-13 |
| cg10377245                                                                            | SLC16A3;SLC16A3;SLC | Island             | TSS200;5'UTR;5'UTR   | Down       | 5.00                                          | 4.2E-156 | cg27056194 | KCNJ1;KCNJ1;KCN | OpenSea            | TSS200;TSS200;TSS200;T  | Up         | 1.62        | 1.64E-16 |
| cg19284277                                                                            | SLC16A3;SLC16A3;SLC | S Shore            | TSS200;5'UTR;5'UTR   | Down       | 4.96                                          | 1.9E-125 | cg05142617 | MAL;MAL;MAL;M   | N Shore            | TSS1500;TSS1500;TSS15   | Up         | 2.82        | 7.44E-43 |
| cg23224090                                                                            | SLC16A3;SLC16A3;SLC | S Shore            | TSS200;5'UTR;5'UTR   | Down       | 3.89                                          | 3.6E-114 | cg02344420 | MAL;MAL;MAL;M   | N Shore            | TSS1500;TSS1500;TSS15   | Up         | 2.26        | 3.86E-31 |
| cg19590707                                                                            | SLC16A3;SLC16A3;SLC | Island             | 5'UTR;TSS1500;5'UTR  | Down       | 3.56                                          | 2.64E-93 | cg21245652 | MAL;MAL;MAL;M   | Island             | TSS1500;TSS1500;TSS15   | Up         | 1.66        | 4.24E-20 |
| cg25804541                                                                            | SLC16A3;SLC16A3;SLC | Island             | 5'UTR;TSS1500;5'UTR  | Down       | 3.49                                          | 8.86E-94 | cg25930644 | MYH10           | N Shore            | 5'UTR                   | Up         | 2.45        | 8.41E-44 |
| cg27355141                                                                            | SLC16A3;SLC16A3;SLC | S Shore            | TSS200;5'UTR;5'UTR   | Down       | 2.66                                          | 3.24E-70 | cg28795722 | MYH10           | S Shore            | TSS1500                 | Up         | 2.20        | 2.24E-53 |
| cg09147131                                                                            | SLC16A3;SLC16A3;SLC | Island             | 5'UTR;TSS1500;5'UTR  | Down       | 2.57                                          | 2.65E-92 | cg19580810 | RAB25;RAB25     | OpenSea            | 1stExon;5'UTR           | Up         | 4.31        | 7.44E-92 |
| cg03956820                                                                            | SLC16A3;SLC16A3;SLC | S Shore            | 1stExon;5'UTR;5'UTR  | Down       | 2.44                                          | 1.59E-58 | cg15896939 | RAB25           | OpenSea            | TSS200                  | Up         | 3.69        | 1.69E-65 |
| cg18083597                                                                            | SLC16A3;SLC16A3;SLC | S Shore            | TSS200;5'UTR;5'UTR   | Down       | 2.36                                          | 4.28E-66 | cg09243900 | RAB25           | OpenSea            | TSS200                  | Up         | 3.64        | 2.74E-54 |
| cg07763231                                                                            | SLC16A3;SLC16A3     | Island             | 5'UTR;5'UTR          | Down       | 2.36                                          | 1.3E-81  | cg14294859 | SLC25A25;SLC25A | OpenSea            | Body;Body;Body;5'UTR    | Up         | 5.00        | 2.42E-74 |
| cg17932802                                                                            | SLC16A3;SLC16A3;SLC | Island             | TSS200;5'UTR;5'UTR   | Down       | 2.25                                          | 1E-94    | cg13983182 | SLC25A25;SLC25A | OpenSea            | Body;TSS1500            | Up         | 2.03        | 1.48E-58 |
| cg18345635                                                                            | SLC16A3;SLC16A3     | N Shore            | TSS1500;TSS1500      | Down       | 2.08                                          | 3.32E-43 | cg02811197 | TMEM213;ATP6V   | OpenSea            | TSS1500;5'UTR;5'UTR     | Up         | 3.86        | 9.24E-81 |
| cg21453758                                                                            | SLC16A3;SLC16A3     | N Shore            | TSS1500;TSS1500      | Down       | 1.89                                          | 1.96E-28 | cg03965962 | TMEM213;ATP6V   | OpenSea            | TSS1500;5'UTR;5'UTR     | Up         | 2.85        | 3.94E-61 |
| cg04184297                                                                            | SLC16A3;SLC16A3     | Island             | TSS200;TSS1500       | Down       | 1.57                                          | 3.7E-13  | cg04950931 | TSPAN8          | OpenSea            | TSS1500                 | Up         | 1.95        | 8.27E-49 |
| cg14654468                                                                            | SLC16A3;SLC16A3;SLC | Island             | TSS1500;5'UTR;1stExo | Down       | 1.55                                          | 3.4E-10  | cg12965512 | TSPAN8          | OpenSea            | TSS1500                 | Up         | 2.86        | 7.11E-48 |
| cg23141183                                                                            | SLC16A3             | N Shore            | TSS1500              | Down       | 1.55                                          | 1.16E-39 | cg19871235 | TSPAN8          | OpenSea            | TSS1500                 | Up         | 2.64        | 1.13E-40 |
| cg08296680                                                                            | SLC16A3;SLC16A3     | Island             | TSS200;TSS1500       | Down       | 1.52                                          | 4.04E-07 | cg15684563 | TSPAN8          | OpenSea            | TSS1500                 | Up         | 2.55        | 9.96E-39 |
| cg01942558                                                                            | TNFAIP6             | OpenSea            | TSS200               | Down       | 5.26                                          | 2.7E-126 | cg02965411 | TSPAN8          | OpenSea            | TSS200                  | Up         | 1.65        | 3.99E-23 |
| cg09727050                                                                            | TNFAIP6;TNFAIP6     | OpenSea            | 5'UTR;1stExon        | Down       | 5.18                                          | 5.8E-118 | cg00145141 | GGT6;GGT6       | OpenSea            | TSS200;TSS200           | Up         | 2.63        | 1.79E-44 |
| cg01189638                                                                            | TNFAIP6             | OpenSea            | TSS1500              | Down       | 2.85                                          | 1.82E-54 | cg03044452 | GGT6;GGT6       | OpenSea            | TSS200;TSS200           | Up         | 2.95        | 3.12E-42 |
| cg01974138                                                                            | TNFAIP6             | OpenSea            | TSS1500              | Down       | 1.96                                          | 4.59E-29 | cg00382185 | GGT6;GGT6       | OpenSea            | TSS200;TSS200           | Up         | 2.02        | 1.1E-40  |
| cg09827902                                                                            | C10orf10;RASSF4     | OpenSea            | TSS1500;Body         | Down       | 4.00                                          | 3.12E-80 | cg02986463 | GGT6;GGT6       | OpenSea            | TSS200;TSS200           | Up         | 2.03        | 3.88E-32 |
| cg04444771                                                                            | C10orf10;RASSF4     | S Shelf            | 5'UTR;Body           | Down       | 3.46                                          | 7.52E-91 | cg01984798 | GGT6;GGT6       | OpenSea            | TSS200;TSS200           | Up         | 1.72        | 9.12E-28 |
| cg02334081                                                                            | C10orf10;RASSF4     | OpenSea            | TSS1500;Body         | Down       | 1.66                                          | 2.16E-25 | cg01819502 | GGT6;GGT6       | OpenSea            | TSS1500;TSS1500         | Up         | 1.83        | 1.35E-18 |
| cg15294851                                                                            | DYSF;DYSF;DYSF;DYSF | N Shore            | TSS1500;TSS1500;TSS  | Down       | 4.08                                          | 2.7E-121 | cg22628873 | GGT6;GGT6       | OpenSea            | TSS1500;TSS1500         | Up         | 1.65        | 2.39E-13 |
| cg18186672                                                                            | DYSF;DYSF;DYSF;DYSF | N Shore            | TSS1500;TSS1500;TSS  | Down       | 2.08                                          | 1.48E-32 | cg01996116 | HIGD1A;HIGD1A;H | S Shore            | TSS1500;TSS1500;TSS15   | Up         | 2.36        | 1.51E-38 |
| cg15491567                                                                            | DYSF;DYSF;DYSF;DYSF | N Shore            | TSS1500;TSS1500;TSS  | Down       | 1.84                                          | 1.9E-28  | cg01293485 | HIGD1A;HIGD1A;H | S Shore            | TSS1500;TSS1500;TSS15   | Up         | 1.95        | 5.54E-33 |
| cg05595692                                                                            | HK2                 | N Shore            | TSS1500              | Down       | 3.83                                          | 1.51E-65 | cg14508777 | HIGD1A;HIGD1A;H | S Shore            | TSS1500;TSS1500;TSS15   | Up         | 1.54        | 2.87E-14 |
| cg18638581                                                                            | HK2                 | N Shore            | TSS200               | Down       | 1.60                                          | 3.02E-28 | cg06066452 | PLXNB1;PLXNB1   | Island             | 5'UTR;5'UTR             | Up         | 2.65        | 4.64E-75 |
| cg09769647                                                                            | HK2                 | N Shore            | TSS200               | Down       | 1.52                                          | 5.89E-18 | cg02027352 | PLXNB1;PLXNB1   | N Shore            | 5'UTR;5'UTR             | Up         | 2.48        | 1.42E-64 |
| cg08478685                                                                            | HPCAL1;HPCAL1       | OpenSea            | 5'UTR;5'UTR          | Down       | 4.27                                          | 1.7E-108 | cg12069042 | PLXNB1;PLXNB1   | N Shelf            | 5'UTR;5'UTR             | Up         | 2.40        | 4.32E-68 |
| cg23728189                                                                            | HPCAL1;HPCAL1       | OpenSea            | 5'UTR;5'UTR          | Down       | 4.21                                          | 1.3E-119 | cg09837648 | PLXNB1;PLXNB1   | N Shelf            | 5'UTR;5'UTR             | Up         | 2.13        | 1.65E-47 |
| cg14904034                                                                            | HPCAL1;HPCAL1       | OpenSea            | 5'UTR;5'UTR          | Down       | 4.17                                          | 7.7E-104 | cg01189606 | PLXNB1;PLXNB1   | S Shore            | TSS1500;TSS1500         | Up         | 2.03        | 1.14E-53 |
| cg02101833                                                                            | HPCAL1;HPCAL1       | OpenSea            | 5'UTR;5'UTR          | Down       | 4.01                                          | 8.1E-110 | cg02979520 | PLXNB1;PLXNB1   | S Shore            | TSS1500;TSS200          | Up         | 1.81        | 1.37E-54 |
| cg15773312                                                                            | HPCAL1;HPCAL1       | OpenSea            | 5'UTR;5'UTR          | Down       | 2.68                                          | 3.91E-65 | cg21415292 | PLXNB1;PLXNB1   | N Shelf            | 5'UTR;5'UTR             | Up         | 1.80        | 1.73E-43 |
| cg04618171                                                                            | HPCAL1;HPCAL1       | OpenSea            | 5'UTR;5'UTR          | Down       | 2.38                                          | 2.01E-49 | cg12030667 | PLXNB1;PLXNB1   | S Shore            | TSS1500;TSS200          | Up         | 1.71        | 3.73E-43 |
| cg18969008                                                                            | HPCAL1;HPCAL1       | S Shelf            | 5'UTR;5'UTR          | Down       | 2.22                                          | 6.37E-55 | cg08534147 | PLXNB1;PLXNB1   | S Shore            | TSS1500;TSS1500         | Up         | 1.53        | 6.3E-31  |
| cg11938718                                                                            | HPCAL1;HPCAL1       | OpenSea            | 5'UTR;5'UTR          | Down       | 1.98                                          | 5.04E-55 | cg24851854 | TACSTD2         | Island             | 1stExon                 | Up         | 2.38        | 1.2E-27  |
| cg14118850                                                                            | HPCAL1;HPCAL1       | S Shelf            | 5'UTR;5'UTR          |            |                                               |          |            |                 |                    |                         |            |             |          |

Supplemental Table 4. Location of metastasis and prior therapy in patient-matched samples.

| <b>Sample</b> | <b>Site of Metastasis</b> | <b>Treatment</b> |
|---------------|---------------------------|------------------|
| 1             | Bone                      | No               |
| 2             | Bone                      | No               |
| 3             | Lung                      | No               |
| 4             | Soft tissue               | No               |
| 5             | Lung                      | Sorafenib        |
| 6             | Lung                      | No               |
| 7             | Bone                      | No               |
| 8             | Spine                     | Pazopanib        |
| 9             | Lung                      | No               |
| 10            | Lung                      | No               |
| 11            | Lung                      | No               |
